# Supplementary material
Source: PubMed Central journal article supplement (PMC5326483)
Supplement: NIHMS843102-supplement-Table.pdf [file NIHMS843102-supplement-Table.pdf]

Supplemental Data for Table 3

Association between allostatic load index scores and pain severity, unstandardized beta coefficients with 95% confidence intervals.

| Covariates        |          | High risk quartile for each biomarker |                                       | High risk for each biomarker if in lowest or highest 10% |                                    | High risk for each biomarker based on clinical values |                                       | Z-score Summary                       |                                       |
|-------------------|----------|---------------------------------------|---------------------------------------|----------------------------------------------------------|------------------------------------|-------------------------------------------------------|---------------------------------------|---------------------------------------|---------------------------------------|
| Sex               | Female   | Referent                              | <i>Referent</i>                       | <i>Referent</i>                                          | <i>Referent</i>                    | <i>Referent</i>                                       | <i>Referent</i>                       | Referent                              | Referent                              |
|                   | Male     | <b>0.23</b><br><b>(0.18, 0.28)</b>    | <b>0.25</b><br><b>(0.20, 0.31)</b>    | <b>0.14</b><br><b>(0.09, 0.20)</b>                       | <b>0.13</b><br><b>(0.07, 0.19)</b> | <b>0.75</b><br><b>(0.67, 0.82)</b>                    | <b>0.82</b><br><b>(0.74, 0.90)</b>    | 0.05<br>(-0.19, 0.29)                 | 0.06<br>(-0.20, 0.32)                 |
| Age               |          | <b>0.02</b><br><b>(0.02, 0.03)</b>    | <b>0.02</b><br><b>(0.02, 0.02)</b>    | <b>0.01</b><br><b>(0.00, 0.01)</b>                       | 0.00<br>(-0.00, 0.01)              | <b>-0.02</b><br><b>(-0.02, -0.01)</b>                 | <b>-0.02</b><br><b>(-0.03, -0.02)</b> | <b>0.06</b><br><b>(0.05, 0.07)</b>    | <b>0.05</b><br><b>(0.04, 0.07)</b>    |
| Education         |          | -0.05<br>(-0.06, 0.04)                | <b>-0.03</b><br><b>(-0.05, -0.02)</b> | <b>-0.02</b><br><b>(-0.03, -0.00)</b>                    | -0.01<br>(-0.02, 0.00)             | <b>-0.04</b><br><b>(-0.06, -0.03)</b>                 | <b>-0.02</b><br><b>(-0.04, -0.00)</b> | <b>-0.09</b><br><b>(-0.14, -0.04)</b> | <b>-0.07</b><br><b>(-0.13, -0.01)</b> |
| Smoking           | None     | -                                     | <i>Referent</i>                       |                                                          | <i>Referent</i>                    |                                                       | <i>Referent</i>                       |                                       | <i>Referent</i>                       |
|                   | Previous | -                                     | 0.15<br>(-0.06, 0.24)                 |                                                          | <b>0.10</b><br><b>(0.00, 0.20)</b> |                                                       | <b>0.16</b><br><b>(0.03, 0.29)</b>    |                                       | 0.49<br>(-0.06, 0.91)                 |
|                   | Current  | -                                     | <b>0.20</b><br><b>(0.11, 0.29)</b>    |                                                          | 0.05<br>(-0.04, 0.15)              |                                                       | <b>0.26</b><br><b>(0.14, 0.39)</b>    |                                       | <b>0.41</b><br><b>(0.01, 0.81)</b>    |
| Alcohol           |          | -                                     | <b>0.03</b><br><b>(0.02, 0.04)</b>    |                                                          | -0.00<br>(-0.01, 0.02)             |                                                       | 0.01<br>(-0.01, 0.03)                 |                                       | <b>-0.08</b><br><b>(-0.14, -0.02)</b> |
| Physical Activity | Mild     |                                       | -0.02<br>(-0.06, 0.01)                |                                                          | 0.02<br>(-0.02, 0.05)              |                                                       | -0.04<br>(-0.09, 0.01)                |                                       | <b>-0.19</b><br><b>(-0.35, -0.02)</b> |
|                   | Moderate | -                                     | <b>0.05</b><br><b>(0.02, 0.08)</b>    |                                                          | 0.03<br>(-0.01, 0.06)              |                                                       | <b>0.08</b><br><b>(0.04, 0.13)</b>    |                                       | <b>0.14</b><br><b>(0.00, 0.28)</b>    |
|                   | Vigorous | -                                     | <b>0.04</b><br><b>(0.02, 0.07)</b>    |                                                          | 0.02<br>(-0.01, 0.03)              |                                                       | <b>0.09</b><br><b>(0.06, 0.12)</b>    |                                       | <b>0.15</b><br><b>(0.05, 0.26)</b>    |
| Depression        |          | -                                     | 0.02<br>(-0.00, 0.04)                 |                                                          | 0.02<br>(-0.01, 0.04)              |                                                       | <b>0.04</b><br><b>(0.01, 0.07)</b>    |                                       | 0.06<br>(-0.05, 0.16)                 |

|                |       |                                    |       |                                    |       |                                    |       |                                    |
|----------------|-------|------------------------------------|-------|------------------------------------|-------|------------------------------------|-------|------------------------------------|
| Cardiovascular |       | <b>0.17</b><br><b>(0.11, 0.24)</b> |       | <b>0.08</b><br><b>(0.02, 0.15)</b> |       | 0.16<br>(-0.18, 0.25)              |       | <b>0.61</b><br><b>(0.31, 0.91)</b> |
| Respiratory    |       | <b>0.14</b><br><b>(0.05, 0.24)</b> |       | -0.00<br>(-0.10, 0.10)             |       | <b>0.17</b><br><b>(0.04, 0.31)</b> |       | <b>0.73</b><br><b>(0.32, 1.16)</b> |
| Cancer         |       | -0.05<br>(-0.21, 0.10)             |       | 0.03<br>(-0.13, 0.19)              |       | 0.03<br>(-0.18, 0.25)              |       | -0.12<br>(0.92, 0.58)              |
| Arthritis      |       | -0.02<br>(0.08, 0.04)              |       | 0.00<br>(-0.06, 0.06)              |       | 0.02<br>(-0.07, 0.10)              |       | -0.21<br>(-0.49, 0.06)             |
| Diabetes       |       | <b>0.31</b><br><b>(0.21, 0.42)</b> |       | <b>0.50</b><br><b>(0.40, 0.62)</b> |       | <b>0.47</b><br><b>(0.32, 0.62)</b> |       | <b>0.86</b><br><b>(0.38, 1.34)</b> |
| R <sup>2</sup> | 0.094 | 0.129                              | 0.014 | 0.038                              | 0.078 | 0.117                              | 0.026 | 0.045                              |

Model 1: Adjusted for age, gender and education

Model 2: Adjusted for age, gender, education, smoking status, frequency of alcohol consumption, mild, moderate, vigorous activity, depression, CVD, respiratory disease, cancer, diabetes and arthritis
